# Supplementary material for: Association of ambient temperature and influenza-like illness with acute appendicitis: an ecological study using 22-year data
Source: Springer Nature journal article supplement (doi:10.1186/s12889-025-22318-x), 2025-03-29
Supplement: MOESM2 [file 12889_2025_22318_MOESM2_ESM.pdf]

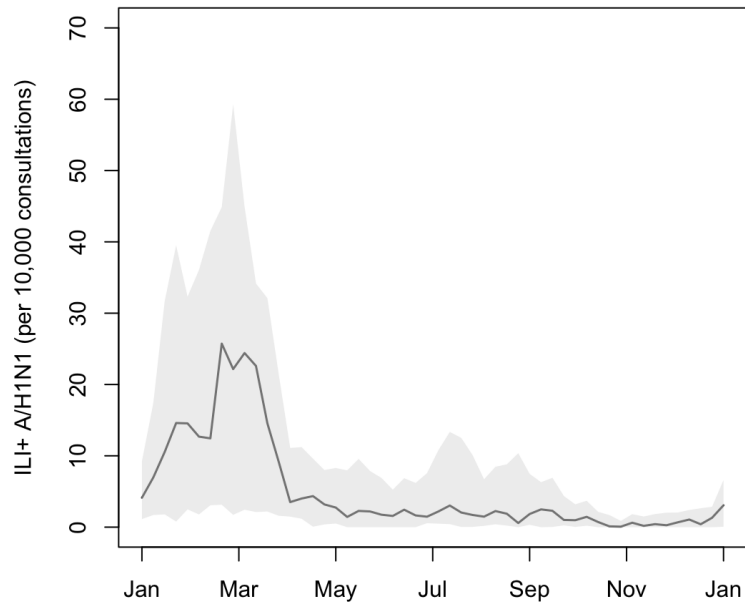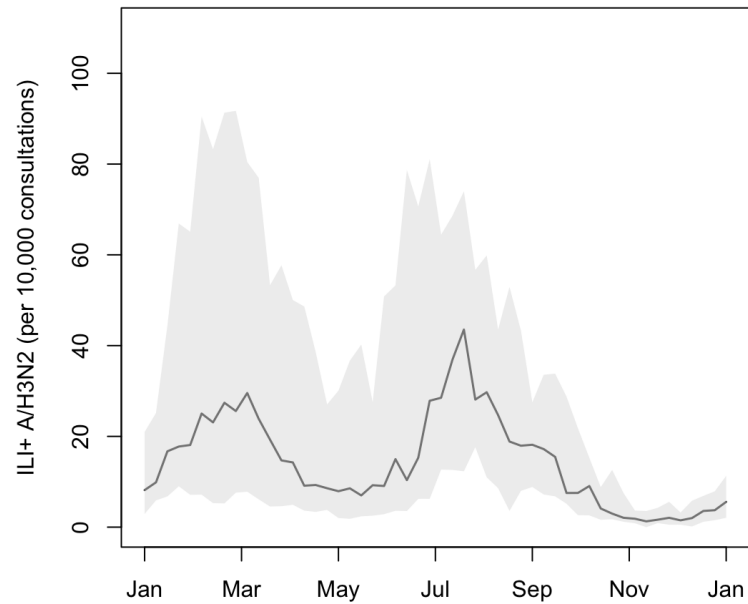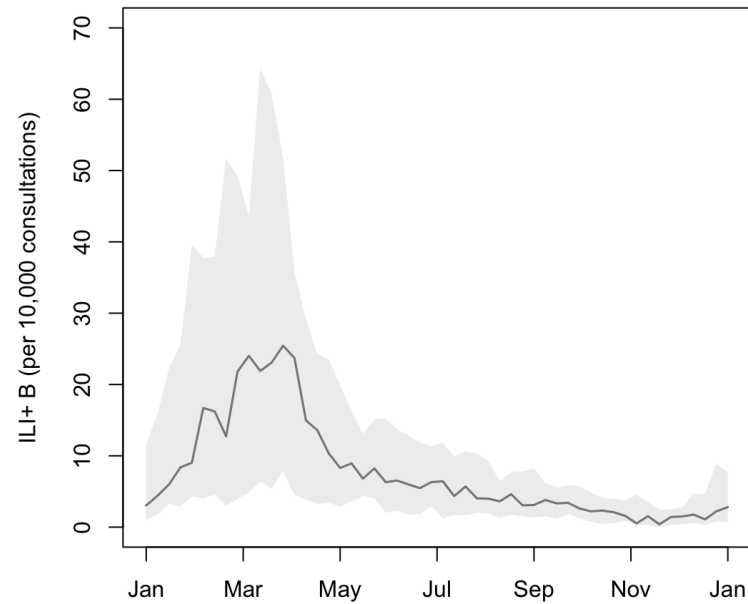

**Figure S1. Seasonal trend of weekly ILI+ rates from 1998 to 2019.** The central lines and the grey bands represent the medians and interquartile ranges respectively.
